# Supplementary material
Source: publisher site journal article supplement (https://www.degruyterbrill.com/publication/isbn/9783050056036/downloadAsset/9783050056036_Buchinformation.pdf)
Supplement: Supplementary file 1 [file 9783050056036_Buchinformation.pdf]

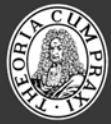

# Akademie Verlag

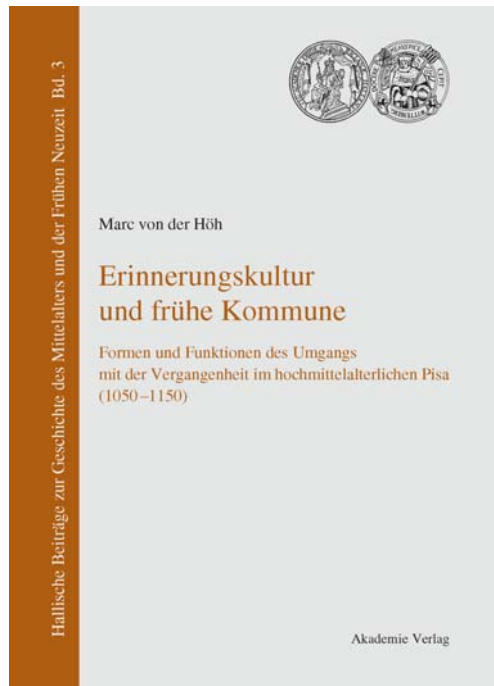

Marc von der Höh

## Erinnerungskultur und frühe Kommune

Formen und Funktionen des Umgangs mit der Vergangenheit im hochmittelalterlichen Pisa (1050–1150)

*Hallische Beiträge zur Geschichte des Mittelalters und der Frühen Neuzeit, Band 3*

2007. 529 Seiten, 61 Abb., Festeinband, € 69,80  
ISBN 978-3-05-004181-0

In der zweiten Hälfte des 11. Jahrhunderts setzt in Pisa eine breite historiographische Überlieferung ein. Scheinbar aus dem Nichts entstehen Annalen, Geschichtsdichtungen und chronikalische Texte, die sich nahezu ausschließlich der Stadtgeschichte widmen. Zeitgleich ist zu beobachten, wie die Auseinandersetzung mit der städtischen Vergangenheit in den Stadtraum hineingetragen wird. Inschriften, Votivstiftungen, Trophäen der Kämpfe gegen die Sarazenen sowie antike Spolien überziehen die städtische Topographie mit einem Netz von Verweisen auf die Geschichte der Stadt, machen den Stadtraum so zu einem Erinnerungsraum.

Auf der Basis detaillierter Untersuchungen zu den einzelnen Zeugnissen entwirft der Autor zunächst ein komplexes Gesamtbild der in dieser Zeit einzigartigen Pisaner Erinnerungskultur. Parallel hierzu wird nach Gründen für die Entstehung dieses reichen Überlieferungskomplexes gesucht, indem Voraussetzungen und Funktionen der unterschiedlichen Formen des Vergangenheitsbezuges im Kontext der frühkommunalen Phase der Stadtgeschichte bestimmt werden. Über den Einzelfall Pisa hinausgehend werden neue methodische Zugänge entwickelt und grundlegende Erkenntnisse über frühe kommunale Erinnerungskulturen gewonnen.
